# Supplementary material for: Bimetallic PdPt nanoparticle-incorporated PEDOT:PSS/guar gum-blended membranes for enhanced CO2 separation
Source: Royal Society of Chemistry journal article supplement (doi:10.1039/d4nr03292f), 2024-11-21
Supplement: d4nr03292f1.pdf [file d4nr03292f1.pdf]

1 **Supplementary materials**

2  
3 **Bimetallic PdPt nanoparticles incorporated PEDOT:PSS/Guar gum blended**  
4 **membranes for enhanced CO<sub>2</sub> separation**

5  
6 **Nishel Saini<sup>a</sup>, Gaurav Pandey<sup>a</sup>, Ankit Sharma<sup>b</sup>, Kamakshi Pandey<sup>a,b</sup>, Kamlendra Awasthi<sup>a\*</sup>**

7  
8 <sup>a</sup>Department of Physics, Malaviya National Institute of Technology Jaipur, Rajasthan 302017,  
9 India

10 <sup>b</sup>Materials Research Centre, Malaviya National Institute of Technology, Jaipur 302017, India

11  
12 \*Corresponding author email: [kawasthi.phy@mnit.ac.in](mailto:kawasthi.phy@mnit.ac.in)

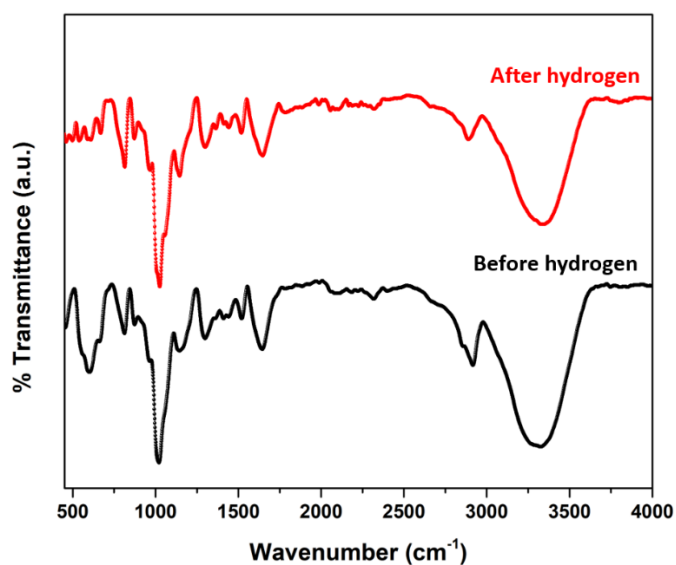

14  
15 **Figure S1.** FTIR spectrum of 20% PEDOT:PSS/PdPt/GG composite membranes before and  
16 after hydrogen separation experiment.

17

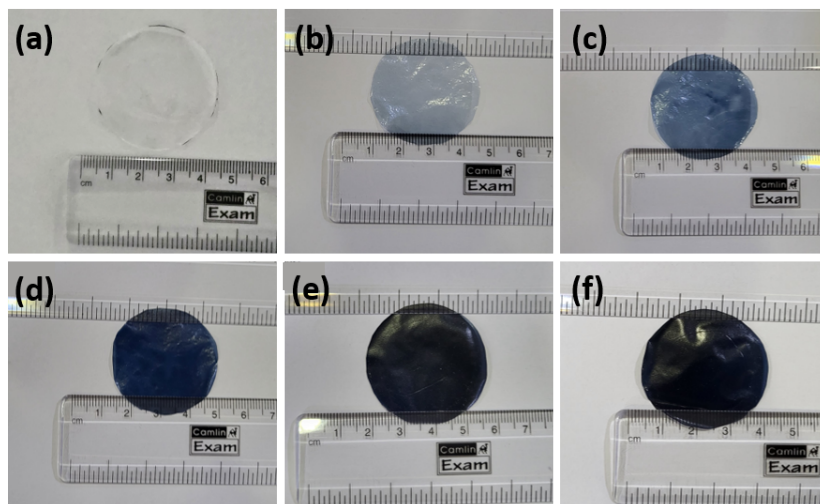

18

19 **Figure S2.** Photographs of the front view of (a) pure GG, (b) 5% PEDOT:PSS/GG, (c) 10%  
20 PEDOT:PSS/GG, (d) 15% PEDOT:PSS/GG, (e) 20% PEDOT:PSS/GG, and (f) 50%  
21 PEDOT:PSS/GG membranes.

22

23

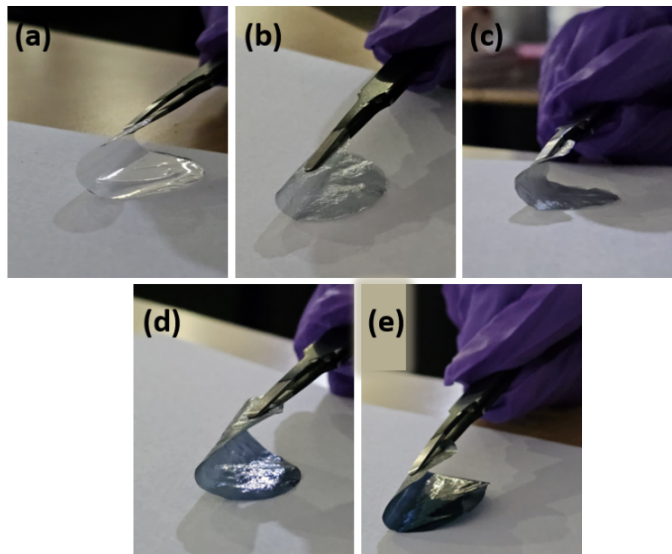

24

25 **Figure S3.** Photographs of the folded view of (a) pure GG, (b) 5% PEDOT:PSS/GG, (c) 10%  
26 PEDOT:PSS/GG, (d) 15% PEDOT:PSS/GG, and (e) 20% PEDOT:PSS/GG.

27

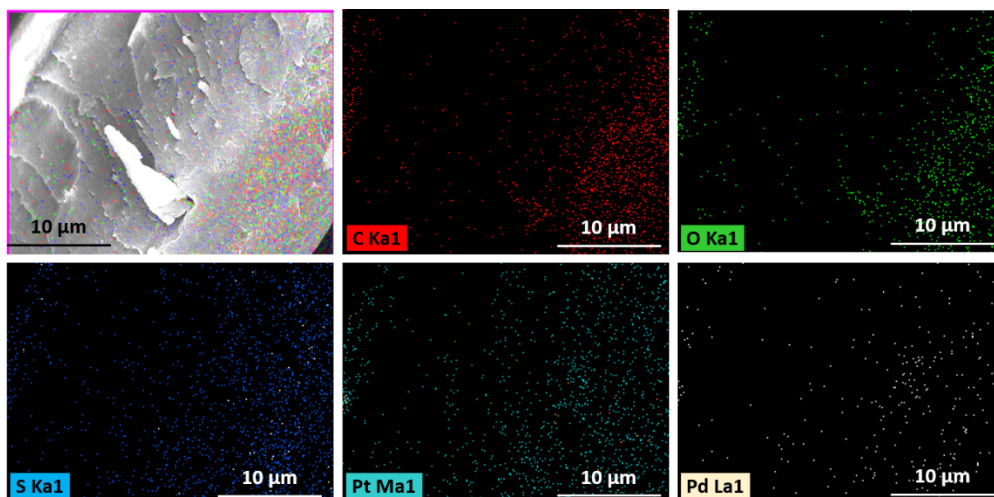

28

29

30

31

**Figure S4.** EDS mapping images cross-section of C, O, S, Pt, and Pd elements in 20% PEDOT:PSS/PdPt/GG composite membranes.

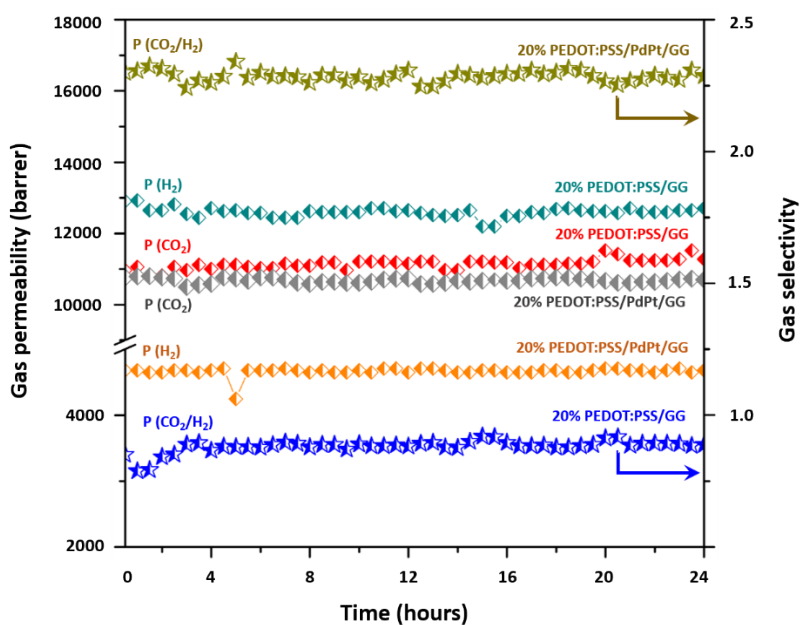

32

33

34

35

36

**Figure S5.** CO<sub>2</sub>/H<sub>2</sub> separation performance of 20% PEDOT:PSS/GG and 20% PEDOT:PSS/PdPt/GG composite membranes.

**Table S1.** FTIR peak assignment corresponding to the Guar gum material.

| Peaks (cm <sup>-1</sup> ) | Bond assignments |
|---------------------------|------------------|
|---------------------------|------------------|

|                  |                                           |
|------------------|-------------------------------------------|
| 811              | C-H stretching vibrations (aromatic ring) |
| 870              | C-H bending vibrations (aromatic ring)    |
| 1015, 1062, 1144 | Ester group (-C-O-C-) group               |
| 1644             | C-C bond stretching                       |
| 2915             | Stretching vibrations of -CH group        |
| 3341             | Stretching vibrations of -OH groups       |

37

38

39

**Table S2.** FTIR peak assignment corresponding to the PEDOT:PSS material.

| <b>Peaks (cm<sup>-1</sup>)</b> | <b>Bond assignments (PEDOT: PSS)</b>        |
|--------------------------------|---------------------------------------------|
| 708                            | C-S stretching                              |
| 854, 1008                      | C-S-C bond in thiophene ring in PEDOT       |
| 1059                           | Symmetric -O-S-O- deformation in PSS        |
| 1125                           | Ester group (-C-O-C-) asymmetric stretching |
| 1162                           | S-O bond vibrations                         |
| 1256                           | Ester group (-C-O-C-) symmetric stretching  |
| 1373                           | Alkyl C-H bending (aliphatic hydrocarbons)  |
| 1535                           | -C=C group vibrations                       |
| 1733                           | C-C bond stretching (phenyl group)          |

40
